# Supplementary material for: An Amylase-Like Protein, AmyD, Is the Major Negative Regulator for α-Glucan Synthesis in Aspergillus nidulans during the Asexual Life Cycle
Source: PubMed Central journal article supplement (PMC5412281; doi:10.3390/ijms18040695), 2017-03-27
Supplement: ijms-18-00695-s001.pdf [file ijms-18-00695-s001.pdf]

Table S1 Quantification of conidiation

| Medium      | CM          |                     |
|-------------|-------------|---------------------|
| Strains     | Wild type   | <i>actA(p)-agnB</i> |
| Conidiation | 100% ± 9.7% | 94.7% ± 5.9%        |

10<sup>5</sup> conidia were grown on 1.5mL medium in 24-well plate at 30 °C for 4 d. 1 mL ultra-pure H<sub>2</sub>O was used to collect conidia from each well. Conidia were quantified by hemocytometer. Results represent the average of three independent quantification tests with triplicates each time ± standard deviation.

Table S2 Expression of *agsB* in *amyD*Δ and *actA(p)-amyD* strains

|             | A1149 | <i>amyD</i> Δ | <i>actA(p)-amyD</i> |
|-------------|-------|---------------|---------------------|
| <i>agsB</i> | 1     | 1.12± 0.27    | 1.08± 0.15          |

A large number of conidia (2 × 10<sup>7</sup>) were inoculated in liquid CM and incubated at 30 °C for 14 h. The expression of *agsB* in A1149 strain was defined as 1. Results present the mean of three independent qPCR tests with triplicates each time ± standard deviation.

Table S3 *Aspergillus nidulans* strains in this study

| Strains                      | alias | Genotype                                                                      | Origin         |
|------------------------------|-------|-------------------------------------------------------------------------------|----------------|
| A1149                        | A1149 | <i>pyrG89; pyroA4; nkuA::argB</i>                                             | FGSC*          |
| <i>actA(p)-amyD</i>          | AXH38 | <i>amyDp:: AfpyroA:actAp:amyD; pyrG89; pyroA4; nkuA::argB</i>                 | He et al. [10] |
| <i>actA(p)-amyC</i>          | AXH52 | <i>amyCp:: AfpyroA:actAp:amyC; pyrG89; pyroA4; nkuA::argB</i>                 | this study     |
| <i>actA(p)-amyE</i>          | AXH53 | <i>amyE:: AfpyroA:actAp:amyE; pyrG89; pyroA4; nkuA::argB</i>                  | this study     |
| <i>agnB</i> Δ                | AXH78 | AN3790:: <i>AfpyroA; pyrG89; pyroA4; nkuA::argB</i>                           | this study     |
| <i>agnE</i> Δ                | AXH42 | AN1604:: <i>AfpyroA; pyrG89; pyroA4; nkuA::argB</i>                           | this study     |
| <i>mutA</i> Δ                | AXH79 | AN7349:: <i>AfpyrG; pyrG89; pyroA4; nkuA::argB</i>                            | this study     |
| <i>agnB</i> Δ, <i>mutA</i> Δ | AXH80 | AN3790:: <i>AfpyroA; AN7349::AfpyrG; pyrG89; pyroA4; nkuA::argB</i>           | this study     |
| <i>actA(p)-agnB</i>          | AXH50 | <i>agnBp:: AfpyroA:actAp:agnB; pyrG89; pyroA4; nkuA::argB</i>                 | this study     |
| <i>actA(p)-agnE</i>          | AXH47 | <i>agnEp:: AfpyroA:actAp:agnE; pyrG89; pyroA4; nkuA::argB</i>                 | this study     |
| <i>actA(p)-mutA</i>          | AXH51 | <i>mutAp:: AfpyroA:actAp:mutA; pyrG89; pyroA4; nkuA::argB</i>                 | this study     |
| <i>actA(p)-agnB, amyD</i> Δ  | AXH55 | <i>agnBp:: AfpyroA:actAp:agnB; AN3308::AfpyrG; pyrG89; pyroA4; nkuA::argB</i> | this study     |
| <i>actA(p)-mutA, amyD</i> Δ  | AXH56 | <i>mutAp:: AfpyroA:actAp:mutA; AN3308::AfpyrG; pyrG89; pyroA4; nkuA::argB</i> | this study     |
| <i>amyD-gfp</i>              | AXH86 | <i>amyD:: AfpyroA:actAp:gfp; pyrG89; pyroA4; nkuA::argB</i>                   | this study     |

\* Fungal Genetics Stock Center

Table S4 Primers and plasmids in this study

| Primers                                         | Sequence 5' to 3'                               | Description                           |
|-------------------------------------------------|-------------------------------------------------|---------------------------------------|
| <b>Selective marker and strain confirmation</b> |                                                 |                                       |
| AME1                                            | ATGTCGTCCAAGTCGCAATT                            | <i>AfpyrG</i> *                       |
| AME2                                            | TCATGACTATGCCGATACTAC                           | <i>AfpyrG</i> *                       |
| SE231                                           | GGACATCAGATGCTGGACTAAAG                         | <i>AfpyrA</i> with native promoter    |
| SE232                                           | TTACCATCCTCTCTGGCCA                             | <i>AfpyrA</i> with native promoter    |
| AME7                                            | CAATACCGTCCAGAAGCAATAC                          | <i>AfpyrG</i> confirmation*           |
| AME8                                            | CACATCCGACTAGCACTATCC                           | <i>AfpyrG</i> confirmation*           |
| AME15                                           | ATTCTGTTCATGGCCAAAG                             | <i>AfpyrA</i> confirmation*           |
| AME16                                           | TCAACAACATCTCCGGTACC                            | <i>AfpyrA</i> confirmation*           |
| <b>Gene deletion</b>                            |                                                 |                                       |
| SE103                                           | CGGCCATTGACCATGAAC                              | <i>amyD</i> upstream F                |
| SE104                                           | AATTGCGACTATGGACGACATTGTGACGATGTCTGGACCG        | <i>amyD</i> upstream R (pyrG tail)    |
| SE105                                           | GAGTATGCGCAAGTCATGATTTGATCTGTTTTTCATCTTTTTGC    | <i>amyD</i> downstream F (pyrG tail)  |
| SE106                                           | GTCATAGATGTCATACCCGTTTC                         | <i>amyD</i> downstream R              |
| SE107                                           | GTCTTCATCCGGTCCACTATC                           | <i>amyD</i> Fusion F                  |
| SE108                                           | GAAGATGAGGGTGTGTCG                              | <i>amyD</i> Fusion R                  |
| SE343                                           | GGGGAGTCGAGTTTACACCA                            | <i>agnB</i> upstream F                |
| SE344                                           | CTTAGTAATCCAGCATCTGATGTCCGATCTGGACCGTCAGTTTCG   | <i>agnB</i> upstream R (pyroA tail)   |
| SE408                                           | TGGCCAAGAGAGGATGGTAATTAGCGCATTGTTTCTGCAG        | <i>agnB</i> downstream F (pyroA tail) |
| SE409                                           | GTAGAGACCGCGCTCTGTCT                            | <i>agnB</i> downstream R              |
| SE347                                           | TTCTCAGTAACCCCAAGACG                            | <i>agnBA</i> Fusion F                 |
| SE410                                           | CGAAGACTGACTTTGGTACCG                           | <i>agnBA</i> Fusion R                 |
| SE320                                           | ATGCCATTGAGCTGGACATT                            | <i>agnE</i> F                         |
| SE321                                           | TCATATCAGGCAAGAGAGCAGG                          | <i>agnE</i> R                         |
| SE322                                           | CTGGCGAGAGATTCTGGAAC                            | <i>agnE</i> upstream F                |
| SE323                                           | TCCATTACCCATTTCAAGC                             | <i>agnE</i> upstream R (pyroA tail)   |
| SE324                                           | TGGCCAAGAGAGGATGGTAACACCTAATACCAGGCCAGTTTT      | <i>agnE</i> downstream F (pyroA tail) |
| SE325                                           | CCTCATATAGAGACCGCGCA                            | <i>agnE</i> downstream R              |
| SE326                                           | CTAGCCTAGCATCTTTACCGACTG                        | <i>agnEΔ</i> Fusion F                 |
| SE327                                           | GTAGAGTTGGGACTTAAGCTAGTCG                       | <i>agnEΔ</i> Fusion R                 |
| SE349                                           | AGTAATTTGCGCGATACCC                             | <i>mutA</i> upstream F                |
| SE411                                           | GGGCGAGCCTTTAACGTACAGTTGCTTGCTTGAGGCT           | <i>mutA</i> upstream R (pyrG tail)    |
| SE190                                           | AATTGCGACTTGGACGACATGGTGTGTTAGGGGTG             | <i>actAp</i> R (pyrG tail)            |
| SE191                                           | TACGTTAAAGGCTCGCCC                              | <i>actAp</i> F                        |
| SE412                                           | GAGTATGCGCAAGTCATGATGCTAGAAGGATCGAGCCA          | <i>mutA</i> downstream F (pyrG tail)  |
| SE413                                           | GTTTTCTCTGACCCAGTCG                             | <i>mutA</i> downstream R              |
| SE353                                           | GTTTCGAGTTGGTTGCGAGTC                           | <i>mutAΔ</i> Fusion F                 |
| SE414                                           | CCAAGTTGAGTCTTACGCCG                            | <i>mutAΔ</i> Fusion R                 |
| <b>Promoter exchange</b>                        |                                                 |                                       |
| SE234                                           | TGGCCAAGAGAGGATGGTAATACGTTAAAGGCTCGCCC          | <i>actA(p)</i> F (pyroA tail)         |
| SE208                                           | GGTGTGTTAGGGGTGGATTAGAA                         | <i>actA(p)</i> R                      |
| SE355                                           | AGAGCTCATCGTGAAGGATGA                           | <i>amyC</i> upstream F                |
| SE356                                           | CTTAGTAATCCAGCATCTGATGTCCGTTTGATAGACGGATCTGTCTT | <i>amyC</i> upstream R (pyroA tail)   |
| SE357                                           | TTCTAATCCACCCCTAAACACCATGACTGACAGATTCGCCC       | <i>amyC</i> F ( <i>actA(p)</i> tail)  |
| SE358                                           | CGTGTGTAAAGTGGGGAGG                             | <i>amyC</i> _1100 R                   |
| SE359                                           | CCTGGAAGTACCTAGGAAACTGG                         | <i>actA(p)-amyC</i> Fusion F          |
| SE360                                           | AAATTATTGAGTCTAATGGGCGAC                        | <i>actA(p)-amyC</i> Fusion R          |

|       |                                                  |                                       |
|-------|--------------------------------------------------|---------------------------------------|
| SE361 | GGCGCTCCAGTTATACCG                               | <i>amyE</i> upstream F                |
| SE362 | CTTAGTAATCCAGCATCTGATGTCCCCTTAGAAAGGTAGGTTGCTGTG | <i>amyE</i> upstream R (pyroA tail)   |
| SE363 | TTCTAATCCACCCCTAAACACCATGCGGCGCCTCACATGT         | <i>amyE</i> F ( <i>actA</i> (p) tail) |
| SE364 | GTCAGTAGAAGTATGCAGCAGGTTCT                       | <i>amyE</i> _1100 R                   |
| SE365 | AAATACCGTTCACCTTGGACG                            | <i>actA</i> (p)- <i>amyE</i> Fusion F |
| SE366 | CATGGGGTAATTCAGGAGACC                            | <i>actA</i> (p)- <i>amyE</i> Fusion R |
| SE343 | GGGGAGTCGAGTTTACACCA                             | <i>agnB</i> upstream F                |
| SE344 | CTTAGTAATCCAGCATCTGATGTCCGATCTGGACCGTCAGTTTCG    | <i>agnB</i> upstream R (pyroA tail)   |
| SE345 | TTCTAATCCACCCCTAAACACCATGTATCTGAAAACGCTCTTTTTG   | <i>agnB</i> F ( <i>actA</i> (p) tail) |
| SE346 | TTCTCGTCTTGAATGTACTGGTC                          | <i>agnB</i> _1140 R                   |
| SE347 | TTCTCAGTAACCCCAAGACG                             | <i>actA</i> (p)- <i>agnB</i> Fusion F |
| SE348 | GAATGCTGCTCACATGTCCA                             | <i>actA</i> (p)- <i>agnB</i> Fusion R |
| SE322 | CCGACTGACCATTTCATC                               | <i>agnE</i> upstream F                |
| SE323 | CTTAGTAATCCAGCATCTGATGTCCTTTGCTTCAGGTTTCGCTTC    | <i>agnE</i> upstream R (pyroA tail)   |
| SE340 | TTCTAATCCACCCCTAAACACCATGCCATTGAGCTGGACATT       | <i>agnE</i> F ( <i>actA</i> (p) tail) |
| SE341 | ACAGCTTGATGAGAGCTCTTGC                           | <i>agnE</i> _1100 R                   |
| SE326 | CTAGCCTAGCATCTTTACCGACTG                         | <i>actA</i> (p)- <i>agnE</i> Fusion F |
| SE342 | TCACAGGGCCGATATAATGG                             | <i>actA</i> (p)- <i>agnE</i> Fusion R |
| SE349 | AGTAATTTGCGCGATACCC                              | <i>mutA</i> upstream F                |
| SE350 | CTTAGTAATCCAGCATCTGATGTCCCAGTTGCTTGCTTGAGGCT     | <i>mutA</i> upstream R (pyroA tail)   |
| SE351 | TTCTAATCCACCCCTAAACACCATGAAGATCTCCACCGCTG        | <i>mutA</i> F ( <i>actA</i> (p) tail) |
| SE352 | CTAGGCGCTAAAAGAGCCAA                             | <i>mutA</i> _1100 R                   |
| SE353 | GTTGAGTTGGTTGCGAGTC                              | <i>actA</i> (p)- <i>mutA</i> Fusion F |
| SE354 | TACGTCAACCGAAAACCTCCAG                           | <i>actA</i> (p)- <i>mutA</i> Fusion R |
| SE429 | CCAGTGAAAAGTTCTTCTCCTTTACTGCAGTATAGACCAGCGGTCG   | <i>amyD</i> _186R gfp tail            |
| SE427 | CATGGCATGGATGAAGTATACAAAGCTGGGGGAACGTTAGT        | <i>amyD</i> _1633F gfp tail           |
| SE328 | AGTAAAGGAGAAGAAGCTTTTCACTGG                      | gfp F no start codon                  |
| SE315 | TTGTATAGTTCATCCATGCCATG                          | gfp R no stop codon                   |
| qPCR  |                                                  |                                       |
| SE244 | CACCCGGACACTAGGTATCTC                            | Histone qPCR F#                       |
| SE245 | GAATACTATCGTAACGGCCTTGG                          | Histone qPCR R#                       |
| SE153 | GGATGGAGATGACCCTGCTA                             | <i>amyD</i> qPCR F                    |
| SE154 | TGCGCATCATGGTAGTCATT                             | <i>amyD</i> qPCR R                    |
| SE334 | GGATTCCAGCCAAGTGTGT                              | <i>amyC</i> qPCR F                    |
| SE335 | AAAGCCCACTCCCTCTCATT                             | <i>amyC</i> qPCR R                    |
| SE336 | TCTGGGTAAAGGGACTGGTG                             | <i>amyE</i> qPCR F                    |
| SE337 | GTAGACTTCCCCCATCGTGA                             | <i>amyE</i> qPCR R                    |
| SE332 | CTGGCGAGAGATTCTGGAAC                             | <i>agnB</i> qPCR F                    |
| SE333 | TCCATTACCCATTTTGAAGC                             | <i>agnB</i> qPCR R                    |
| SE330 | CATGATGGGTGGAGGAGTCT                             | <i>agnE</i> qPCR F                    |
| SE331 | CAGGAGAGAGCCGATACCAG                             | <i>agnE</i> qPCR R                    |
| SE338 | CCAAATGGAATCAACCTGCT                             | <i>mutA</i> qPCR F                    |
| SE339 | ATGGGGAAGCTGTTTGTAC                              | <i>mutA</i> qPCR R                    |

#, Fujioka et al. (2007); \*, Alam et al. (2012)

**A** Percent Identity Matrix - created by Clustal2.1

1: AN4507|amyC 100.00 58.97  
 2: AN3308|amyD 58.97 100.00

CLUSTAL O(1.2.4) multiple sequence alignment

```

AN4507|amyC -----MTRFARTDGSSTHSCNLTGL
AN3308|amyD MKILPSRLAYIMTVLSVLNISNAATTAEWKARSIQVTMDRFRARTDGSSTHACNTAGL
                * * * * *

AN4507|amyC YCGGTWRGTIDHLDVIQGMGFDAVLISPIIKNVEKAKKGEAYHCHWAQDMYSLNPHFGT
AN3308|amyD YCGGTWRGTINHLDIQGMGFDAVMISPIIENIGGRVSYGEAYHGWPLDLYSLNDHFGT
                * * * * *

AN4507|amyC HEDLLDLSQALHNRGMFIMMDTVINNMAYTMNGGNPATDVNYSINLNFNEKSFYHPYCKI
AN3308|amyD HQDLLDLSAALHERGMVLMMDTVINNMAYMTDGGDFARNIDYALFPFNKSEYHPYCKI
                * * * * *

AN4507|amyC DWNDYFQSQYCWTDGNIVALFDLNTEDERVQTIEMMIQEMIATYSIDGLRIDAAKHVT
AN3308|amyD KDWNDYHDAQWCQTGDNKVALFDLYTERKDVQDTLISWARGIVKTYSIDGLRIDAAKHVN
                * * * * *

AN4507|amyC PDFIGFKAADVFMEGVYERSVDIICGYQSNIMPSVTNYPIVFALLDAFTIGDTESLP
AN3308|amyD TGFLKTFSDSDVMYVTGEVLQREVDIICNYTENYIDSVENYPIYVSMLDAPGQNTTSLY
                * * * * *

AN4507|amyC NQVESMKSKCPSVTLIIFSENHDLPRFASLKDIDINLAKNITFTLLFDGLPIIYQGOEQ
AN3308|amyD HQVENMKKSCRDUVTIWSFSENHDVARUPSFNDMDLAKNIIITFTLLFDGIPMIYQGOEQ
                * * * * *

AN4507|amyC HFSGSDPHNREALMPSAYDTSSELYNTIHTLNTIRKHAIQIDPDYIYNYTVFVYRGS
AN3308|amyD HLSGSDTFNRQAWLSAYNTDSELYKLIATLAKIRKHVISLGSQY-LDEQTVLRYRGS
                * * * * *

AN4507|amyC EMAFRKGREGRQIIMVLSTQGSNGAYTIRMNGFQPSVVARDFVSCRITWVNV---DMG
AN3308|amyD ELAFSKVGEGRQIIMLLSGQSGKDPYTLTLFVSYNAGTIVDVLHCVNYTSVSGGERAG
                * * * * *

AN4507|amyC ELRLMDRGEFRVLFPEALMRGSLCCHAREKVTYMDFNKTYSPESGDDKSGGGVSS
AN3308|amyD ELDFMKSKEFRVFFADLMESGSLCCHAGNVSIAKLETG-----KDRV---VSGG
                * * * * *

AN4507|amyC VVVGGTGVALVNV---ALLGLISFAMC*
AN3308|amyD RIVGEANATLVIMSVLAGVLLLA*--
                * * * * *
    
```

**B** Percent Identity Matrix - created by Clustal2.1

1: AN6324|amyE 100.00 45.10  
 2: AN3308|amyD 45.10 100.00

CLUSTAL O(1.2.4) multiple sequence alignment

```

AN6324|amyE MRLTCLSAFFLA---SASVAVASPSAEQWARSIVQVMTDRFARFAPGSPGDK-PCDFYR
AN3308|amyD MKILPSRLAYIMTVLSVLNISNAATTAEWKARSIQVTMDRFRARTDGSSTHACNTAGL
                * * * * *

AN6324|amyE YCGGSWTQVIDKLDYIQDLGPTAVQISFPVENIPDMTVYGEAYHGYWPCNMHALNEHFGT
AN3308|amyD YCGGTWRGTINHLDIQGMGFDAVMISPIIENIGGRVSYGEAYHGWPLDLYSLNDHFGT
                * * * * *

AN6324|amyE ADELKRLSELKHKRGMVLMVDVINDMAQAVNSLDGSGNINNSRLIFPNDKYYHFCR
AN3308|amyD HQDLLDLSAALHERGMVLMMDTVINNMAYMTDGGDFARNIDYALFPFNKSEYHPYCKI
                * * * * *

AN6324|amyE IEDWNNPDESKNCWFSTEVVAFDLKTEDESUVSMIEIHWKGLVGNYSIDGLRVDATRHM
AN3308|amyD IKDNDYHDAQWCQTGDNKVALFDLYTERKDVQDTLISWARGIVKTYSIDGLRIDAAKHVN
                * * * * *

AN6324|amyE DEAYLTSPEAAGVTFMGEVYTEDDRAVCKYEEV-LSGLLNYPMYRPMVQARTAGMPLG
AN3308|amyD NTGFLKTFSDSDVMYVTGEVLQREVDIICNYTENYIDSVENYPIYVSMLDAPGQNTTSL
                * * * * *

AN6324|amyE AENVRAVNSKCKDFTRLATFTENHDTFRFASLINDITLARNAMAFNLLSDGIPVYVQGOE
AN3308|amyD YHQVENMKKSCRDUVTIWSFSENHDVARUPSFNDMDLAKNIIITFTLLFDGIPMIYQGOEQ
                * * * * *

AN6324|amyE QHMKGFPAPYHREPLMKTSYNTNGSLKHTSTLAKLNHAILOKHVVSSELELLDGS
AN3308|amyD HLSGSDTFNRQAWLSAYNTDSELYKLIATLAKIRKHVISLGSQY-LDEQTVLRYRGS
                * * * * *

AN6324|amyE TVYTRKSGEGSQIVSVFNSQSGGQFPYLRIRPRAYKFGTEVIEVLSCKRVAD---NEG
AN3308|amyD ELAFSKVGEGRQIIMLLSGQSGKDPYTLTLFVSYNAGTIVDVLHCVNYTSVSGGERAG
                * * * * *

AN6324|amyE QLVARMKRGEPKAFPFVVKRMNGSGLCGFKGRRRGKAICSSAGKGNTRKNDTVNEGTV
AN3308|amyD ELDFMKSKEFRVFFADLMESGSLCCHAGNVSIAKLETG-----KDRV---VSGG
                * * * * *

AN6324|amyE QTSAGNGASVTIPMVLISICVGLAGLEF*--
AN3308|amyD G---E-ANATL---VMIMSVLAGVLLLA*
                * * * * *
    
```

**Figure S1** Amino acid sequence alignment of AmyD with AmyC and AmyE using Clustal Omega online server

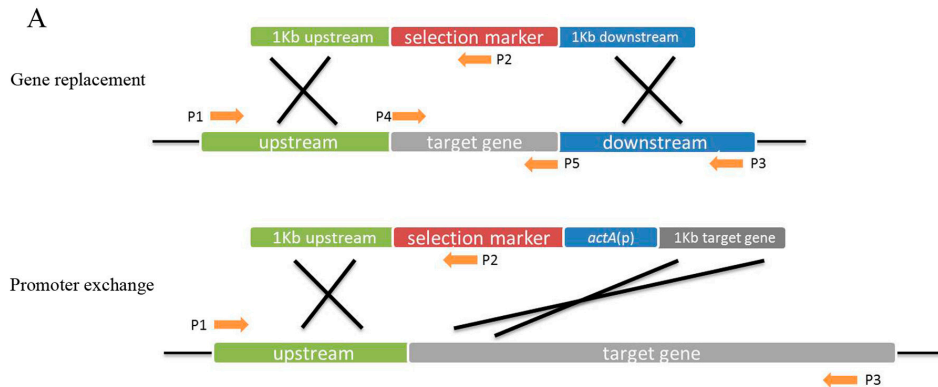

**B**

|                                                                                                                                  |                         |
|----------------------------------------------------------------------------------------------------------------------------------|-------------------------|
| actA(p)-amyC:<br>1Kb amyC upstream + AfpyroA + actAp+ 1Kb amyC<br>(SE355+SE356) (SE231+SE232) (SE234+SE208) (SE357+SE358)        | Fusion PCR: SE359+SE360 |
| actA(p)-amyE:<br>1Kb amyE upstream + AfpyroA + actAp+ 1Kb amyE<br>(SE361+SE362) (SE231+SE232) (SE234+SE208) (SE363+SE364)        | Fusion PCR: SE365+SE366 |
| agnBΔ:<br>1 Kb agnB upstream + AfpyroA + 1Kb agnB downstream<br>(SE343+SE344) (SE231+SE232) (SE408+SE409)                        | Fusion PCR: SE347+SE410 |
| agnEΔ:<br>1 Kb agnE upstream + AfpyroA + 1Kb agnE downstream<br>(SE322+SE323) (SE231+SE232) (SE324+SE325)                        | Fusion PCR: SE326+SE327 |
| mutAΔ:<br>1Kb mutA upstream + actAp+ AfpyrG + 1Kb mutA downstream<br>(SE349+SE411) (SE190+SE191) (AME1+AME2) (SE412+SE413)       | Fusion PCR: SE353+SE414 |
| agnBΔ, mutAΔ:<br>1 Kb agnE upstream + AfpyroA + 1Kb agnE downstream<br>(SE322+SE323) (SE231+SE232) (SE324+SE325)                 | Fusion PCR: SE326+SE327 |
| 1Kb mutA upstream + actAp+ AfpyrG + 1Kb mutA downstream<br>(SE349+SE411) (SE190+SE191) (AME1+AME2) (SE412+SE413)                 | Fusion PCR: SE353+SE414 |
| actA(p)-agnB:<br>1Kb agnB upstream + AfpyroA + actAp+ 1Kb agnB<br>(SE343+SE344) (SE231+SE232) (SE234+SE208) (SE345+SE346)        | Fusion PCR: SE347+SE348 |
| actA(p)-agnE:<br>1Kb agnE upstream + AfpyroA + actAp+ 1Kb agnE<br>(SE322+SE323) (SE231+SE232) (SE234+SE208) (SE340+SE341)        | Fusion PCR: SE326+SE342 |
| actA(p)-mutA:<br>1Kb mutA upstream + AfpyroA + actAp+ 1Kb mutA<br>(SE349+SE350) (SE231+SE232) (SE234+SE208) (SE351+SE352)        | Fusion PCR: SE353+SE354 |
| actA(p)-agnB, amyDΔ:<br>1Kb agnB upstream + AfpyroA + actAp+ 1Kb agnB<br>(SE343+SE344) (SE231+SE232) (SE234+SE208) (SE345+SE346) | Fusion PCR: SE347+SE348 |
| 1 Kb amyD upstream + AfpyrG + 1Kb amyD downstream<br>(SE103+SE104) (AME1+AME2) (SE105+SE106)                                     | Fusion PCR: SE107+SE108 |
| actA(p)-mutA, amyDΔ:<br>1Kb mutA upstream + AfpyroA + actAp+ 1Kb mutA<br>(SE349+SE350) (SE231+SE232) (SE234+SE208) (SE351+SE352) | Fusion PCR: SE353+SE354 |
| 1 Kb amyD upstream + AfpyrG + 1Kb amyD downstream<br>(SE103+SE104) (AME1+AME2) (SE105+SE106)                                     | Fusion PCR: SE107+SE108 |

**Figure S2** Gene replacement and promoter exchange schema and PCR constructs of each strain. (A) Design of construct was shown in the figure. Positions of verification PCR primers were also listed. Generally, P1+P2 were used to confirm the construct insertion into the genome. Wildtype strain results no band and the constructed strains usually result a 2Kb band. P1+P3 were used to detect whether ectopic insertion was occurred in the same genome. Because the sequence length of the selection marker (or plus *actA* promoter) is mostly different from that of the target sequence, this pair of primer should result different bands in different strains. In addition, if ectopic insertion happened, the result of the constructed strain should also show a band as that of wildtype. Occasionally, P4+P5 were used to confirm the absence of the target gene, which was only used in gene replacement construct. (B) Details of primers used for construct generation were listed.

>AN6542 upstream COORDS:ChrI\_A\_nidulans\_FGSC\_A4  
TACGTTAAAGGCTCGCCCCAACCTCGAAAAGGCGGTAAAATACTAAAAACGGTCCTTAGA  
AGGCCTTTTCGACAACGATTTAGAAGGGCTGAGTACAAAAGGAGATCAACCACAGATAGT  
ATCGAGCGTGGTTATAGAGAACTAGTTCAGCACATGCCTTATTCCTTTTTTTTCTTCCCATT  
TTTTTTTCTTTCTTAAAGGACAGATATAAAAATCTGGAAGCCTGGAGTAGGATCCCCTTAG  
GCATTGTTGAACTTCAGGAAAAAGTGAGTCGTCATCGTGCTTACAAGCAGAGAGCGATAA  
TAATAGAACGAATGAGAGGACAGACCCTGTTCTTTGAAAACCTGGACACGCTGGGCTGAA  
CCATCATTACGGCCTTGGTCGTCGGTCTCTGCCCCACGAGGATTCATCATCTCGCGAGGCC  
ACCTCAGCGCGCAATCATTCTGCCTGAGAGGCAACACTTGGTCGCCAGTATAAAAGAACC  
AATTGAACAAGAGACACCTATCTCGTAGCAGTCTTTGTGTAGTCTGTACTTTATTCGTTTTA  
CCCTCTGAGGAAACGCGGTGGCGGTGACCATTGACTAGACGAGACTAAGCCCCTTTGG  
CGCCTGAACCTCCAGCCCCTTTCCAGTCCTTCTGTTTCAGTTCGAGCGGCTGTCGAGCTGCT  
GCTGACTACTCCGCCTACCGCTACAACCTCCACCACCACCGACCACCAACAACCCTCGAC  
TCTCTCCCCTTCTCTCCTCCACTTCTCAACATCCAACCTCCCATTCTCGCTCTGTTCATCATCT  
CTCCTCCTCCCTTCTTACCTGTCAACCTCTCATTCTTTTTCTCTTTGTTCTTCGTAGTTCGA  
TTCTAATCCACCCCTAAACACC

**Figure S3** Sequence of *actA* upstream

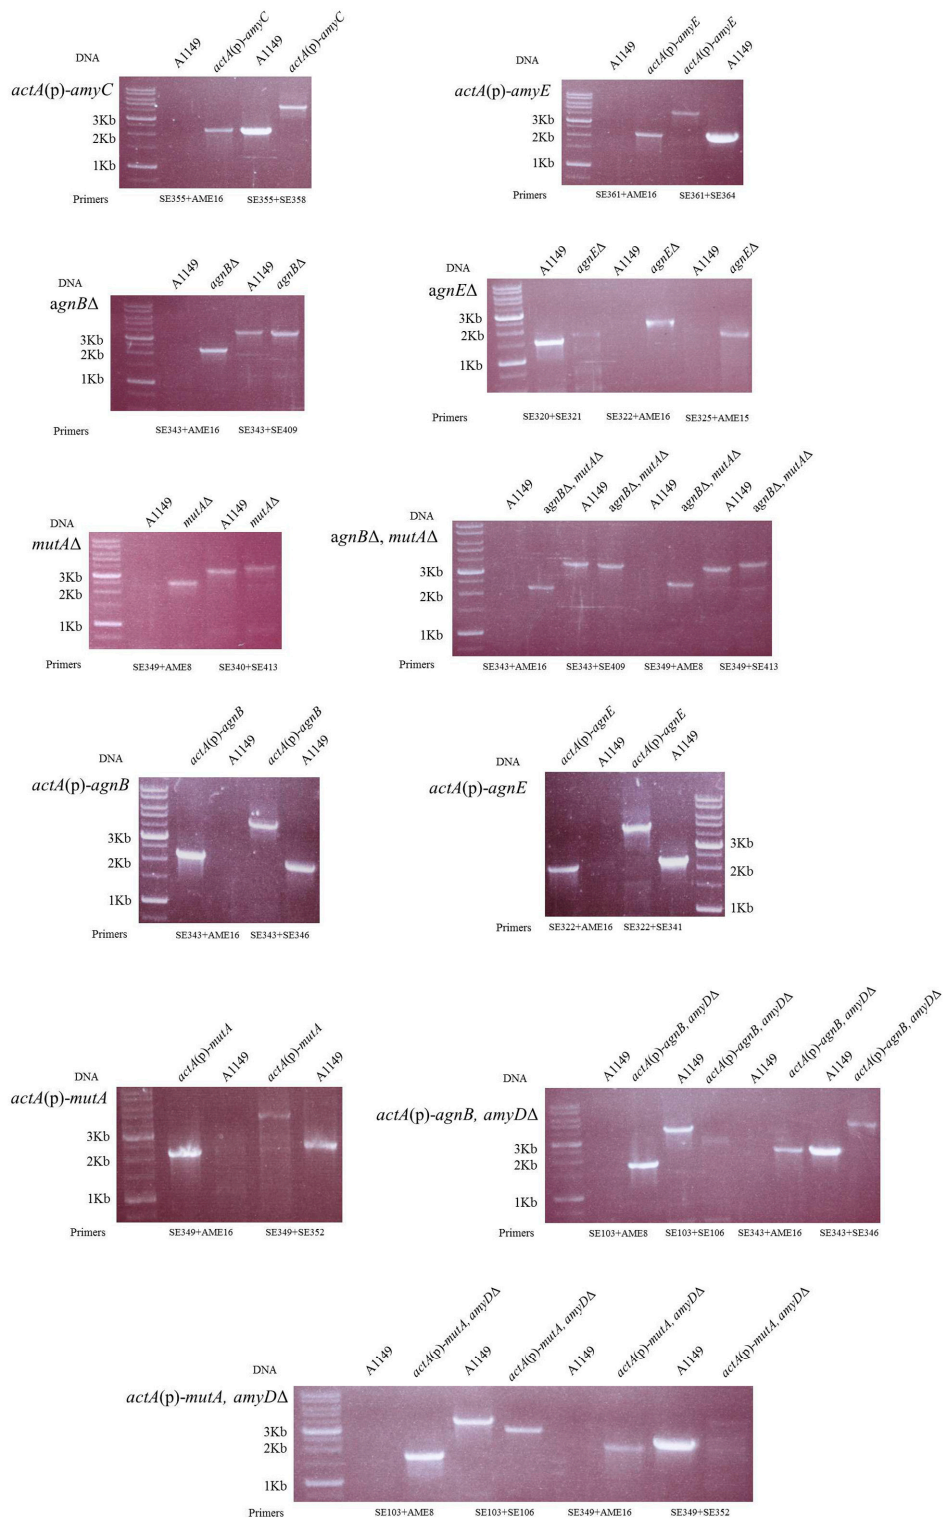

**Figure S4** PCR confirmation of all constructed strains. Strains labeled at right of each gel picture. Primers are indicated at the bottom and DNA templates are on the top.
